# Supplementary material for: Global Identification of Prokaryotic Glycoproteins Based on an Escherichia coli Proteome Microarray
Source: PLOS journal article supplement (doi:10.1371/journal.pone.0049080), 2012-11-07
Supplement: S3 (10.1371/journal.pone.0049080.s003) [file journal.pone.0049080.s003]

**Table S2.** Molecular function:catalytic activity.

| <b>No.</b> | <b>GO term</b>                       | <b>Gene Number</b> | <b>Percentage</b> | <b>Gene Name</b>      |
|------------|--------------------------------------|--------------------|-------------------|-----------------------|
| 1          | transferase activity (GO:0016740)    | 4                  | 30.77%            | aroK, Exo, deoA, talB |
| 2          | hydrolase activity (GO:0016787)      | 4                  | 30.77%            | ribD, hisP, Exo, holC |
| 3          | ligase activity (GO:0016874)         | 1                  | 7.69%             | ydiD                  |
| 4          | oxidoreductase activity (GO:0016491) | 1                  | 7.69%             | maoC                  |
| 5          | deaminase activity (GO:0019239)      | 1                  | 7.69%             | ribD                  |
| 6          | lyase activity (GO:0016829)          | 1                  | 7.69%             | Edd                   |
| 7          | isomerase activity (GO:0016853)      | 1                  | 7.69%             | surA                  |
